# Supplementary material for: Preventing neuronal edema increases network excitability after traumatic brain injury
Source: JCI journal article supplement (doi:10.1172/jci134793), 2020-10-11
Supplement: sd1 [file 1]

## 1 **Supplemental Materials**

### 2 **Methods**

#### 3 *Surgical preparation for electrophysiology and imaging*

4 Mice were anesthetized using urethane (1.5 g/kg i.p. Sigma-Aldrich U2500; (1))  
5 supplemented with isoflurane (~0.5%), if necessary. Body temperature was monitored and  
6 maintained at 36 - 37°C using a water bath blanket. Once anesthetized, the head was stabilized in  
7 a stereotaxic frame with ear bars and an omega-shaped head bar was mounted on the skull with  
8 glue and dental cement. A 2 mm craniotomy was then performed, centered over the hindpaw  
9 region of primary somatosensory cortex, at 1.5 mm from the midline and 1.0 mm from the  
10 bregma, and the dura was left intact. This cranial window was immediately adjacent to the injury  
11 window. The craniotomy was filled with 2% agarose (mixed in artificial cerebrospinal fluid; in  
12 mM: 124 NaCl, 1.3 CaCl<sub>2</sub>, 3 KCl, 2 MgSO<sub>4</sub>, 1.4 NaH<sub>2</sub>PO<sub>4</sub>, 26 NaHCO<sub>3</sub> and 11 glucose) in order  
13 to keep the cortical surface moist and dampen the movement associated with animal breathing.  
14 The head bar was screwed onto a metal post, which was attached to the stage. The cranial  
15 window was then submerged with ACSF for the entire experiment. Neuronal recordings were  
16 made ~2.0 mm from the center of the CCI lesion (**Figure 1A**).

17

#### 18 *Intrinsic signal imaging of spreading depolarization*

19 Male C57BL/6J mice were used to avoid known sex-linked effects on spreading  
20 depolarization (SD) susceptibility (2). Animals were anesthetized via isoflurane (5% induction,  
21 1.5%-0.8% maintenance) and mounted to a stereotaxic frame. Monitoring was as above,  
22 supplemented with monitoring of respiratory rate as an additional proxy for anesthetic depth  
23 (RR: 84-96 bpm). The right parietal bone was exposed, thinned to transparency 1 mm from

24 sagittal suture, bregma, lambda, and temporal ridge, and coated with silicone oil in preparation  
25 for imaging (3). SD induction burr hole was placed 0.5 mm lateral to the window. The cortex  
26 was illuminated via a white light-emitting diode and OIS (optical intrinsic signal) was collected  
27 with high-sensitivity monochrome CCD Camera (Mightex USB 2.0). Imaging parameters were  
28 adjusted via BUFCCD Camera App [resolution: 696x520 pixels (1:2 bin), CCD freq. 28 MHz,  
29 and frame time (0.1 ms) 10, exposure time 20 ms]. Images were acquired at 0.5 Hz for 2 hours,  
30 controlled by a Master-8 pulse generator (AMPI). A 15-minute baseline was established to  
31 ensure SDs that were not induced by the surgical preparation. Data was excluded from analysis if  
32 SD was present in baseline recordings. A 1 M KCl (potassium chloride) solution was delivered  
33 via syringe pump (WPI SP100i) through a 30Gx1in (regular bevel; BD PrecisionGlide™ Needle)  
34 syringe needle, placed at the corner of the burrhole, not touching cortex, at 1 ml/h for duration of  
35 recording. Excess KCl was wicked from a small depression drilled on the lateral side of burr hole  
36 using lens tissue. Offline analysis of SD transients was made with ImageJ (3, 4).

37

### 38 ***Histology***

39 *Tissue Processing:* 48 h after CCI or sham surgery, mice were anesthetized with isoflurane and  
40 then perfused transcardially with cold phosphate buffered saline (PBS) followed by a fixative  
41 containing 4% paraformaldehyde (PFA) in PBS. After the brain was removed, it was postfixed in  
42 PFA for 24 hours and then stored in PBS until it was sectioned. Coronal sections 30 μm in  
43 thickness were cut using a tissue slicer (Leica Biosystems) and mounted on Superfrost/Plus  
44 slides. Sections were collected from bregma +2.0 to -3.0 mm that included the cortical impact  
45 site.

46

47 *Flurojade-B (FJB) Staining*: Staining was performed per published methods (5). Briefly,  
48 sections were incubated in following solutions: 100% alcohol, 3 min; 70% alcohol, 1 min;  
49 distilled water, 1 min; 0.04% potassium permanganate, 15 min; dH<sub>2</sub>O, 1 min; 0.001% FJB in  
50 acetic acid, 30 min; dH<sub>2</sub>O, 3 times, 1 min. Stained sections were dried at room temperature  
51 overnight, were immersed in xylenes and then cover slips were applied using DPX mounting  
52 media. FJB-stained slices were imaged using a Hamamatsu Nanozoomer 2.0 HT (Olympus) at  
53 20X magnification.

54

## 55 **Western blot**

56 Western blot was performed similar to our published methods (6). Briefly, mice were  
57 anesthetized and sacrificed with overdose of isoflurane, the brain was rapidly removed, and the  
58 somatosensory cortex was dissected and placed in ice-cold buffer (0.1 M PBS). Frozen tissues  
59 were homogenized in ice-cold homogenization buffer (10 mM NaPO<sub>4</sub>, 100 mM NaCl, 10 mM  
60 Na pyrophosphate, 25 mM NaF, 5 mM EDTA, 5 mM EGTA, 2% Triton X-100, 0.5%  
61 Deoxycholate, 1 mM Na vanadate, pH 7.4) with a homogenizer, in the presence of protease  
62 inhibitors (complete mini, Roche, in fresh 100 mM Phenylmethylsulfonyl fluoride (PMSF)  
63 dissolved in ethanol). Tissue samples were briefly sonicated and lysed using the buffer, and  
64 centrifuged at 14,000 rpm for 5 min at 4°C. The supernatant was collected and protein was  
65 measured using the DC Protein Assay (Bio-Rad, Hercules, CA). Expression of Glyceraldehyde  
66 3-phosphate dehydrogenase (GAPDH) was used as a loading control. Samples from sham and  
67 CCI mice were run in parallel. Optical density measurements were performed using ImageJ  
68 software and normalized to total protein levels (25 µg total protein). Protein samples (25 µg)  
69 were fractionated by SDS-PAGE (sodium dodecyl sulfate–polyacrylamide gel electrophoresis)

70 and transferred to a polyvinylidene difluoride (PDVF) membrane. After incubation with 10%  
71 nonfat milk in 1xPBS for 60 min, the membrane was further incubated with polyclonal  
72 antibodies against KCC2 (1:1,000, Millipore; product no. 07-432) or NKCC1 (1:500, Millipore;  
73 product no. AB3560P), or a monoclonal  $\beta$ -tubulin antibody (1:10,000, Sigma Aldrich; product  
74 no. T5201) at RT for 2 h. The blots were then incubated with a 1:2000 dilution of horseradish  
75 peroxidase-conjugated anti-rabbit IgG (GE Healthcare; product no. NA934) or anti-mouse  
76 antibodies (1:2000, GE Healthcare; product no. NA931) for 2 h at RT. Blots were visualized  
77 with enhanced chemiluminescence (Amersham/GE Healthcare). Optical density measurements  
78 were performed using NIH Image J software and quantified as optical density per 25  $\mu$ g of total  
79 protein.

80

## 81 **Results and Discussion**

### 82 *Cell size measurements during calcium activity*

83 Because we used an activity-dependent cytosolic calcium sensor, whose response  
84 characteristics might affect our area measurements, we only measured neuronal cross-sectional  
85 area from recordings of baseline calcium activity, during which ~96% of neurons were inactive  
86 (the small percentage of active neurons was not included in primary analysis). A low number of  
87 active cells during baseline is not unexpected, as layer 2/3 pyramidal neurons tend to fire fewer  
88 action potentials in vivo under anesthesia (7). We also analyzed the small percentage of active  
89 neurons from Thy1-GCaMP6s mice to determine whether the baseline  $[Ca^{+2}]$  changes had an effect  
90 on area measurements. We found no changes (3/6 neurons), increases (2/6 neurons), or decreases  
91 (1/6 neurons) in cross-sectional area during calcium activity compared to baseline (with no  
92 activity). We concluded that changes in GCaMP fluorescence during neuronal activity may

93 modestly affect changes in cross-sectional area measurements, though with the small number and  
94 inconsistent direction of change it is difficult to be certain. In any case we conservatively elected  
95 to omit analysis of active neurons in order to prevent any possible biasing of results.

96

### 97 *Mechanisms of reduced excitatory input onto pyramidal neurons after TBI*

98 We observed a dramatic reduction in the frequency of excitatory currents after CCI (**Figure**  
99 **2J,K**). We hypothesize that these are a consequence of the decreased intrinsic membrane  
100 excitability mediated by neuronal swelling. Alternatively, they might reflect a decreased number  
101 of excitatory synapses, decreased rate of action potential (AP) discharge from excitatory  
102 presynaptic neurons, decreased probability of release from terminals, or decreased size of the  
103 readily releasable pool (9, 10) after injury. We did observe a substantial loss of cortical neurons  
104 close to the lesion site in animals exposed to CCI (**Figure 1A,B**); thus, it is possible that a loss of  
105 axonal processes due to neuronal death could result in a reduction in the number of synaptic inputs  
106 in the ‘penumbral’ region (just outside area of neuronal death) we recorded. We also observed a  
107 reduction in AP rate (**Figure 3D**), which could have contributed to the reduction in excitatory  
108 currents and might be due to neuronal loss rather than intrinsic excitability changes. Finally, other  
109 mechanisms, e.g. plasticity- or injury-based reduction in synaptic input (11), are possible and  
110 cannot be ruled out. However, unlike these alternative mechanisms, the intrinsic membrane  
111 changes provide a unifying explanation for all the behavior we observed.

112

### 113 *Possible role for potassium and I<sub>h</sub> currents in excitability changes after TBI*

114 Intrinsic mechanisms besides neuronal swelling could contribute to changes in network  
115 activity. We observed decreases in up state area under the curve (AUC) in CCI neurons which are

116 mainly attributable to decreases in duration. We also observed reduced frequency of AP firing in  
117 layer 2/3 pyramidal neurons (**Figure 3D**). A reduction in AP firing could recruit activity-dependent  
118 potassium channels less efficiently, leading to longer up states (12). However, we observed shorter  
119 up states in CCI neurons associated with reduced neuronal firing. Up state duration can also be  
120 modulated by hyperpolarization-activated cyclic nucleotide-gated (HCN) channel mediated Ih  
121 currents (13), possibly by decreasing the input resistance ( $R_{in}$ ), which can effectively shunt  
122 synaptic input (14, 15). Ih currents are enhanced in CA1 pyramidal neurons at 24 h post-CCI injury  
123 (16). However, to our knowledge there is no evidence of *cortical* Ih currents affected by TBI.  
124 Moreover, it is also known that only negligible Ih currents can be recorded from layer 2/3  
125 pyramidal neurons (17, 18) [Suryavanshi, Brennan, unpublished observations]. Changes in Ih  
126 currents also affect neuronal membrane potential (19), and we found no changes in membrane  
127 potential (**Figure 2B**).

128

### 129 ***Reduction in presynaptic release probability in neurons of CCI mice***

130       Sensory-evoked excitatory post-synaptic potentials (EPSPs) displayed two types of  
131 behaviors when stimuli were paired at an interstimulus interval of 200 ms. In most cases (82%, 9  
132 of 11 neurons from both sham and CCI mice), sensory stimulation paired at time intervals of 200  
133 ms produced a 20-30% depression in EPSP. In other cases (18%, 2 of 11 neurons), the paired-  
134 pulse protocol induced a facilitation in EPSP amplitude. On averaged data, a depression was  
135 observed in the 2<sup>nd</sup> response in neurons of both sham and CCI mice. This depression was larger in  
136 neurons of CCI mice relative to sham animals ( $p = 0.02$ , Mann-Whitney test;  $n = 4$  neurons, 4 mice  
137 per group; **Supplemental Figure 1**). This suggests decreased transmitter release probability after  
138 injury.

139

### 140 *Spontaneous spreading depolarization after CCI*

141           Spreading depolarization (SD) is known to occur in response to CCI (20, 21). We recorded  
142 spontaneously occurring SDs (without KCl stimulus) for 4 h beginning immediately after CCI, in  
143 vehicle and bumetanide-treated animals. We consistently observed a single episode of SD  
144 immediately after CCI injury, but did not observe subsequent SDs in the 4 h recording period  
145 (except in one CCI-bumetanide animal with one full and 3 partial SDs after CCI). We did not  
146 observe differences in SD frequency between groups, though there was a significant difference in  
147 duration of SD, with CCI-bumetanide animals showing the shortest duration of SD ( $p = 0.01$ , two-  
148 sided Mann-Whitney test;  $n = 4-5$  mice per group; **Supplemental Figure 3**). No significant  
149 differences in SD speed were observed between treatments ( $p > 0.05$ , two-sided Mann-Whitney  
150 test;  $n = 5-6$  mice per group).

151

### 152 *Role of SD-associated neuronal edema in the response to TBI*

153           SD is known to occur after TBI (20, 21) (our data). SD is also known to induce edema in  
154 both neuronal somata and dendrites (22, 23), ([Sawant-Pokam, Brennan,], unpublished  
155 observations). The mechanisms of this edema, which is specific to neurons (astrocytes are not  
156 observed to swell (22)) are incompletely understood at this time. There is also recent work showing  
157 that SD involved in stroke contributes to post-stroke edema, through SD-induced vasoconstriction  
158 and aquaporin-4-mediated perivascular glymphatic flow (24). The question arises of whether the  
159 neuronal edema we observed is due to TBI-associated SD, and whether the effects of bumetanide  
160 might be due to suppression of post-TBI SD. We found that bumetanide treatment had no effect  
161 on either the frequency or speed of SD initiated after CCI injury. The duration of SD was reduced

162 with bumetanide treatment, but the implications of this are unclear (**Supplemental Figure 3**).  
163 Importantly we observed (with one exception) only one SD event in all animals in the four-hour  
164 recording period after CCI – this agrees with prior work (25). There are two implications: firstly,  
165 the single SD induced by CCI is likely extraordinarily difficult to suppress, as it involves, the rapid  
166 destruction of large volumes of tissue, with the consequent release of 145 mM  $[K^+]_e$  from lysed  
167 cells (26). Second, due to the presence of one difficult to suppress SD event, there is very little  
168 signal to noise for the comparison of vehicle and bumetanide treatment. Thus our results should  
169 not be taken as an indication of inefficacy of bumetanide suppression of SD under other  
170 circumstances.

171

172 Importantly however, the bumetanide treatment we used to test for SD suppression was  
173 effective in reducing neuronal edema (**Figure 4A**). The fact that this bumetanide dose did not  
174 affect SD incidence suggests that its effect on neuronal volume is independent of SD.

175

### 176 *Possible effects of bumetanide on astrocytic cation chloride cotransporters*

177 Astrocytic swelling has been reported to have effects on network excitability, possibly  
178 through increases in extracellular glutamate (27–29) and activation of NMDAR-mediated slow  
179 inward currents in neurons (30). As bumetanide is known to reduce astrocytic swelling observed  
180 after TBI (31), it is possible that we saw network effects resulting from astrocytic as well as  
181 neuronal manipulation. However, one would predict that reducing astrocyte swelling with  
182 bumetanide would *decrease* synaptic and network excitability. Instead, bumetanide had the  
183 opposite effect, increasing the frequency of excitatory currents, area-under-curve of up states and  
184 amplitude of sensory-evoked potentials. Though our data do not rule out the possibility of

185 bumetanide effects on astrocytes, we conclude that the increased network excitation we observed  
186 after bumetanide treatment is mediated by its effects on neurons.

187

188 ***Reducing neuronal edema increases network excitability when bumetanide administered***  
189 ***immediately post-CCI***

190 To improve potential translation of the protective effects of bumetanide on neuronal edema  
191 to clinical settings, we injected bumetanide post-CCI. Using both synapsin1-driven-GCaMP6f-  
192 injected and Thy1-GCaMP6s mice (cell sizes were comparable between two methods; see  
193 **Supplemental Figure 8**), the cross-sectional area of neuronal soma was significantly larger in CCI  
194 mice versus sham mice, consistent with results observed between sham and CCI groups. Moreover,  
195 neurons of CCI-bumetanide mice had smaller somatic area versus CCI-vehicle treated neurons ( $p$   
196 = 0.0008, one-way ANOVA with Bonferroni's multiple comparisons; CCI-bumetanide vs vehicle:  
197 \*\*\* $p < 0.001$ , CCI-vehicle vs sham-vehicle: \*\* $p < 0.01$ ;  $n = 33-75$  neurons, 4 mice per group;  
198 **Supplemental Figure 4A**).

199

200 Next we assessed whether the reduction of neuronal edema with post-CCI bumetanide  
201 treatment would produce an effect on excitability, similar to what we observed with bumetanide  
202 pre-CCI treatment. Using the minimal clonic seizure test in animals injected with bumetanide post-  
203 CCI, we saw increases in the percentage of animals exhibiting seizures in CCI-bumetanide treated  
204 animals, compared to CCI-vehicle (CCI-bumetanide: 50 %, CCI-vehicle: 17 %, sham-vehicle: 22  
205 %, sham-bumetanide: 38 %; ChiSqu test; CCI- bumetanide vs vehicle:  $p = 0.04$ ;  $n = 8-12$  mice per  
206 group; **Supplemental Figure 4B**). Thus, consistent with our bumetanide pre-CCI treatment, we

207 observed an increased susceptibility to seizures when we reduced edema with bumetanide post-  
208 CCI treatment (**Figure 7**).

209

### 210 *Effect of bumetanide administered 48 h post CCI*

211 Administration of bumetanide prior and post- to CCI produced a marked reduction in  
212 neuronal swelling 48 h later (**Figure 4A, Supplemental Figure 4A**). We tested whether this  
213 protective effect on edema could still be obtained if treatment was initiated 48 h after injury. In  
214 contrast to pre-CCI/sham bumetanide treatment, 48 h post-CCI administration in Thy1-GCaMP6s  
215 mice had no effect on neuronal surface area ( $p = 0.001$ , Bonferroni's multiple comparisons test;  
216 CCI-vehicle vs sham-vehicle:  $**p < 0.01$  and CCI-bumetanide vs sham- bumetanide:  $*p < 0.05$ ;  $n$   
217 = 42-55 neurons, 4 mice per group; **Supplemental Figure 5A**).

218

219 We next analyzed network excitability assessed as seizure susceptibility in sham and CCI  
220 mice subjected to vehicle and bumetanide treatments at 48 h post-CCI/sham. As expected based  
221 on neuronal edema results, we did not see any change in the percentage of animals exhibiting  
222 seizures between CCI-bumetanide and CCI-vehicle treated animals at the 5 mA stimulus intensity  
223 (CCI-bumetanide: 30 %, CCI-vehicle: 40 %, sham-vehicle: 10 %, sham-bumetanide: 20 %;  $p >$   
224 0.05, ChiSqu test;  $n = 10$  mice per group; **Supplemental Figure 5B**). Thus, the effects on neuronal  
225 size and excitability observed with pre- and post-treatment of bumetanide is reduced when the  
226 treatment is delayed for 48 h post-injury. This indicates that there are differences in the mechanism  
227 of this edema between 2 and 48 h post injury (see **Discussion**).

228

229 *Bumetanide effects on network excitability 48 h after CCI are likely due to changes in*  
230 *cotransporter gene expression*

231 Bumetanide has a half-life of 47 minutes in mice (32); thus it is highly unlikely that the  
232 effects we observed 48 h after treatment could be due to binding of NKCC1 (or KCC2) by the  
233 drug. We tested the effects of bumetanide delivered 30 min before CCI on the expression of  
234 NKCC1 and KCC2, 2 h after CCI. Both KCC2 and NKCC1 expression were increased in  
235 bumetanide- compared to vehicle-treated CCI cortex (KCC2 -  $p = 0.005$ , Kruskal-Wallis test with  
236 Dunn's multiple comparisons; CCI- bumetanide vs vehicle:  $**p < 0.01$ ; CCI-bumetanide vs sham-  
237 bumetanide:  $p > 0.05$ , CCI-vehicle vs sham-vehicle:  $*p < 0.05$ ;  $n = 5-7$  mice per group; NKCC1 -  
238  $p = 0.008$ , Kruskal-Wallis test with Dunn's multiple comparisons; CCI-bumetanide vs vehicle:  $p$   
239  $< 0.05$ ; CCI-bumetanide vs sham-bumetanide:  $p < 0.01$ , CCI-vehicle vs sham-vehicle:  $p > 0.05$ ;  $n$   
240  $= 5-7$  mice per group; **Supplemental Figure 6A,B**). This resulted in an effective reversal of the  
241 increased NKCC1/KCC2 ratio observed after CCI with vehicle treatment (**Supplemental Figure**  
242 **7**).

243  
244 We also tested whether bumetanide pretreatment (prior to CCI) was required for its effects.  
245 We delivered bumetanide immediately after CCI and recorded neuronal volume and seizure  
246 susceptibility 48 h after CCI. The phenotype was similar to bumetanide delivered prior to injury,  
247 with a normalization of neuronal volume and an increase in seizure susceptibility (**Supplemental**  
248 **Figure 4**, compare with **Figure 4A, 7**).

249  
250 Finally, we tested for effects of bumetanide when the drug was delivered at the 48 h time  
251 point, 45 min prior to measurement of neuronal volume and seizure susceptibility. In contrast to

252 bumetanide delivered either 30 min before or immediately after CCI, there was no difference in  
253 neuronal volume compared to vehicle treated animals (i.e. edema was not reduced) and there was  
254 no difference in seizure susceptibility (i.e. it was similar to vehicle treatment) (**Supplemental**  
255 **Figure 5**, compare with **Figure 4A, 7, Supplemental Figure 4**). Taken together these data suggest  
256 that the effects of bumetanide are due to changes in cotransporter expression, rather than direct  
257 cotransporter binding by the drug.

258

### 259 *Mechanisms of SD and seizure susceptibility after TBI*

260 Like neuronal excitability, SD and seizure susceptibility are subject to parameters that may  
261 exert opposite influences. In part, these parameters are identical: increased neuronal volume  
262 should, other things equal, be associated with a decrease in excitability, increased neuronal  
263 chloride content with an increase. However, for network events like SD and seizures, the  
264 characteristics of the extracellular space become potentially important. Neuronal (or astrocytic)  
265 swelling restricts the interstitial space, increasing ion concentrations and extracellular space  
266 tortuosity (33, 34). Other things equal these changes might increase susceptibility to SD (34),  
267 though the reality might be complex; e.g. increased tortuosity might contribute to local increases  
268 in  $[K^+]_e$ , but might hinder propagation. Our data do not allow us to measure all of the relevant  
269 parameters, but they strongly suggest that even in the presence of factors that might increase SD  
270 susceptibility, the reduction in neuronal intrinsic excitability predominates 48 h after CCI injury.

271

272 Our data might appear to contradict work in brain slices, showing that neuronal volume  
273 perturbations with hypo-osmotic agents are associated with increases in excitability, and that a  
274 hyperosmotic agent, mannitol, is linked with decreases in seizure-like activity. There may be key

275 differences in preparation that account for this discrepancy. Brain slice preparations typically use  
276 osmotic changes to study seizure-like activity (35–40). Acute hypo-osmolality in vitro can enhance  
277  $[K^+]_e$  concentration, field effects, and EPSP input by reducing extracellular space through  
278 astrocytic swelling, ultimately enhancing neuronal synchronization and seizure activity (35–40).  
279 However, acute osmotic changes (minutes) have little effect on neuronal volume (41–43), likely  
280 because neurons lack aquaporin channels (41–43) (but see (44)), and neurons swell on longer time  
281 scales (hours-days) with regulated mechanisms (42). Moreover, changing extracellular osmolality  
282 does not change the intrinsic membrane properties of neurons (38, 39, 45, 46). To our knowledge,  
283 no studies have explored the effects of osmolality on endogenous membrane properties in vivo.  
284 Acute osmotically mediated changes in excitability observed in brain slices likely model a  
285 mechanistically relevant component of brain injury, as alterations in EPSC input (possibly  
286 mediated by increases in extracellular glutamate) and ionic changes (increases in  $[K^+]_e$ ) can occur  
287 early in injury. From the translational standpoint, the net effect of the multiple changes associated  
288 with injury may be more important. Our data shows that as neurons swell after TBI, both neuronal  
289 membrane excitability and network activity decrease. This is further supported by other in vivo  
290 work which shows reduced sensory-evoked neuronal firing after TBI (47, 48). In sum, though our  
291 data may appear contradictory to acute osmotically evoked seizure models in brain slices, this in  
292 vivo work is probably the most predictive translationally.

293

#### 294 *No difference in lesion size or cell death after bumetanide treatment*

295 We tested whether the inhibition of NKCC1 with bumetanide which is responsible for  
296 increased excitability was also responsible for the changes in cortical lesion size and  
297 neurodegeneration. Data shows that the area of cortical contusion lesion in the ipsilateral cortex as

298 a percentage of the contralateral uninjured cortex was 15% in CCI-vehicle group, whereas the area  
299 of lesion was 14.26% in the CCI-bumetanide group at 48 h post-injury. No changes in lesion area  
300 were detected between vehicle and bumetanide-treated groups ( $p > 0.05$ , two-sided unpaired t-test;  
301  $n = 5$  mice per group; **Data not shown**). Analysis of fluoro-jade (FJB) staining indicated that there  
302 was substantial cell degeneration at 48 h after CCI injury. Robust staining was observed on the  
303 ipsilateral side to the impact in the perilesional area (i.e., around the lesion site). As expected, we  
304 did not see any cell death in sham-treated animals. In order to compare FJB staining between  
305 vehicle and bumetanide groups, we measured number of positive neurons in the perilesional area.  
306 There was no difference between groups ( $p > 0.05$ , two-sided unpaired t-test;  $n = 5$  mice per group;  
307 **Data not shown**). Importantly, the blockade of neuronal swelling with bumetanide increases the  
308 incidence of SD and seizures. Though we observed no expansion of lesion size and neuronal death,  
309 it is difficult to conclude that these might not be damaging events, given evidence for both SD and  
310 seizures in worsening outcomes in brain injury (49, 50).

311

### 312 *Spatial profile of CCI-associated changes in excitability*

313 Our seizure data affirms that excitability effects observed after CCI are not exclusively  
314 associated with pericontusional domains but rather have global effects on network activity. We  
315 show increases in seizure susceptibility after edema treatment by using the minimal clonic seizure  
316 model with corneal stimulation (51). This protocol induces seizure phenotypes illustrating  
317 consistent pattern of whole brain activation: corneal stimulation likely takes advantage of visual  
318 pathways and is known to involve forebrain (52, 53). Moreover, seizure behavior such as forelimb  
319 clonus was not lateralized (i.e., restricted to one forepaw). Prior work supports that TBI is  
320 associated with both ipsi- and contralateral changes in KCC2 expression, suggesting that we might

321 anticipate a similar effect in the non-injured hemisphere (54). These observations do not prove that  
322 there has been a change in baseline excitability beyond the ‘injury penumbra;’ however it does  
323 show that the excitability changes we observe, whether they be local or more diffuse, have  
324 widespread effects on network excitability.

325

326

327 **Supplemental Figures**

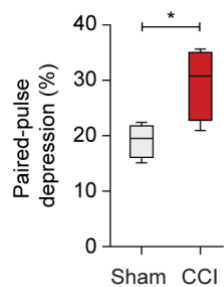

328

329 **Supplemental Figure 1.** *Paired pulse depression to sensory stimulation after CCI.* There was  
330 depression of the second stimulus-evoked response, relative to the first response, in neurons of  
331 both sham and CCI mice. This depression is more dramatic in neurons of CCI mice ( $*p = 0.02$ ;  
332 one-sided Mann-Whitney test;  $n = 4$  neurons, 4 mice per group).

333

334

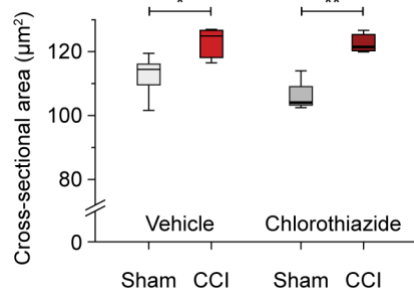

335

336 **Supplemental Figure 2.** *Chlorothiazide* (10 mg/kg, i.p.), a peripherally active diuretic, lacks  
 337 effects on neuronal edema. We imaged neuronal cross-sectional area with in vivo two-photon  
 338 microscopy of GCaMP6f-injected mice 48 h post-CCI/sham treated with chlorothiazide. Similar  
 339 to CCI vehicle-treated neurons with increased cross-sectional area relative to sham-vehicle group,  
 340 CCI neurons treated with CTZ also have larger cross-sectional area, relative to sham-CTZ neurons  
 341 ( $p = 0.001$ , one-way ANOVA with Bonferroni's multiple comparisons test; CCI-CTZ vs sham-  
 342 CTZ:  $**p < 0.01$ , CCI-vehicle vs sham-vehicle:  $*p < 0.05$ ;  $n = 49-66$  cells, 3-5 mice per group).

343

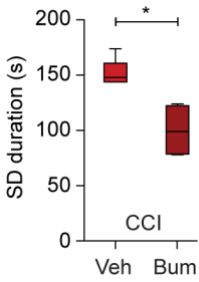

344

345 **Supplemental Figure 3.** *Bumetanide reduces duration of CCI-evoked spontaneous spreading*  
346 *depolarization activity.* In CCI-vehicle treated animals, SD activity was sustained for  
347 approximately 150 s. However, the duration of SD in CCI animals was significantly reduced  
348 following bumetanide treatment, compared to CCI-vehicle ( $*p = 0.01$ , two-sided Mann-Whitney  
349 test;  $n = 4-5$  mice per group).

350

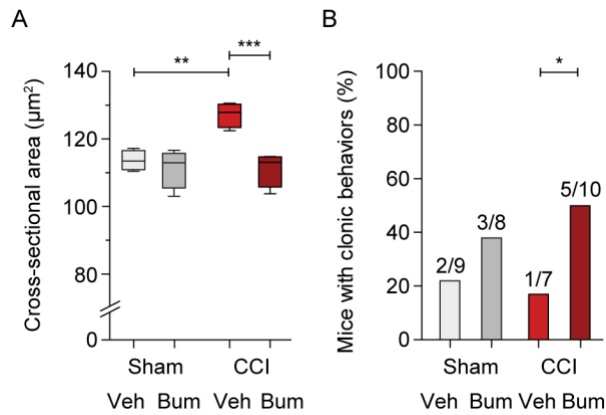

351

352 **Supplemental Figure 4.** *Bumetanide administered immediately post-CCI eliminates neuronal*

353 *edema and increases network excitability.* **A.** Quantification of neuronal cross-sectional area

354 shows reversal of edema with bumetanide post-CCI treatment ( $p = 0.001$ , one-way ANOVA with

355 Bonferroni multiple comparisons test; CCI-bumetanide vs vehicle:  $**p < 0.01$ , CCI-vehicle vs

356 sham-vehicle:  $**p < 0.01$ ;  $n = 32-70$  neurons, 4-5 mice per group). **B.** Bumetanide induced

357 reduction of post-CCI neuronal edema increases network excitability, as assessed by increases in

358 the percentage of animals exhibiting seizures (CCI- bumetanide vs vehicle:  $*p = 0.04$ , ChiSqu test;

359  $n = 8-12$  mice per group; number of mice showing seizures and group size are indicated for each

360 group.).

361

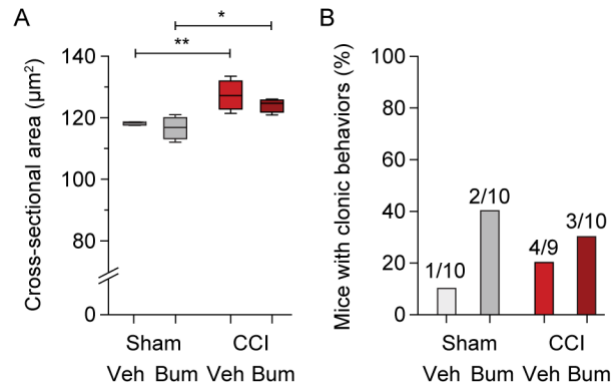

362

363 **Supplemental Figure 5. Bumetanide administered at 48 h post-CCI fails to reduce neuronal**

364 *swelling*. **A.** Quantification of neuronal cross-sectional area shows no changes in neuronal edema

365 with bumetanide ( $p = 0.001$ , one-way ANOVA with Bonferroni multiple comparisons test; CCI-

366 bumetanide vs sham-bumetanide:  $*p < 0.05$ , CCI-vehicle vs sham-vehicle:  $**p < 0.01$ ;  $n = 42-55$

367 neurons, 4 mice per group). **B.** Plot showing the percentage of animals with seizure activity (%) in

368 sham and CCI animals treated with vehicle or bumetanide. Consistent with no effect on neuronal

369 swelling, bumetanide injected at 48 h post-CCI does not affect seizure susceptibility (CCI-

370 bumetanide vs vehicle:  $p > 0.05$ , ChiSqu test;  $n = 10$  mice per group; number of mice showing

371 seizures and group size are indicated for each group.).

372

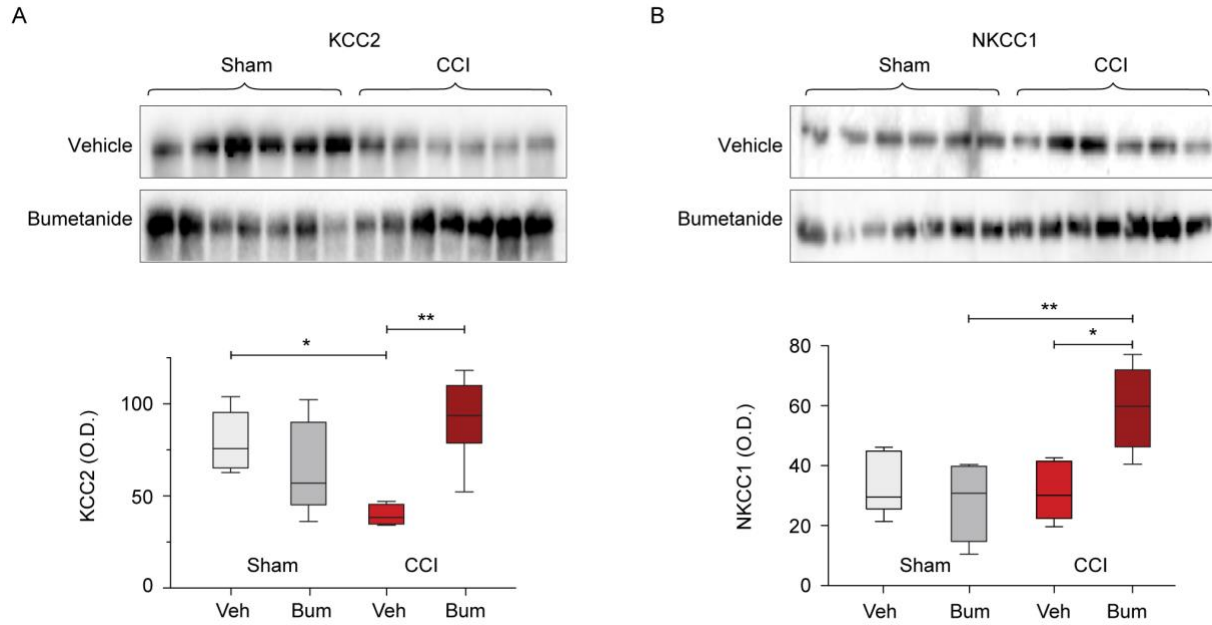

373

374 **Supplemental Figure 6.** *Cation chloride cotransporter expression in the injured cortex 2 h after*

375 *CCI. A.* The protein expression level of KCC2 was significantly decreased 2 h after TBI.

376 Bumetanide significantly elevated KCC2 expression in CCI mice, relative to CCI-vehicle

377 animals ( $p = 0.005$ , Kruskal-Wallis test with Dunn's multiple comparisons; CCI-bumetanide vs

378 vehicle:  $**p < 0.01$ ; CCI-bumetanide vs sham-bumetanide:  $p > 0.05$ , CCI-vehicle vs sham-

379 vehicle:  $*p < 0.05$ ;  $n = 5-6$  mice per group). **B.** Although, NKCC1 expression levels were

380 unaltered after TBI, pre-treatment with bumetanide significantly upregulated NKCC1 expression

381 at 2 h after TBI, relative to CCI-vehicle and sham-bumetanide ( $p = 0.008$ , Kruskal-Wallis test

382 with Dunn's multiple comparisons; CCI-bumetanide vs vehicle:  $*p < 0.05$ ; CCI-bumetanide vs

383 sham-bumetanide:  $**p < 0.01$ , CCI-vehicle vs sham-vehicle:  $p > 0.05$ ;  $n = 5-6$  mice per group).

384 All lanes within the boxes were run on the same gels.

385

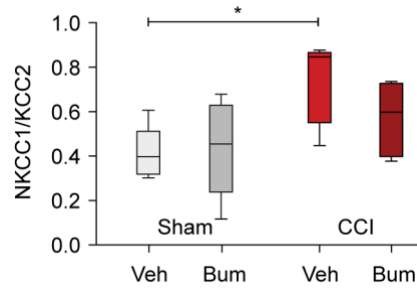

386

387 **Supplemental Figure 7.** Alterations in the expression ratio of chloride cotransporters 2 h after  
 388 traumatic brain injury. Increase in the ratio of NKCC1 to KCC2 expression levels in CCI-  
 389 vehicle group, compared to sham-vehicle. This increase was moderately reversed by bumetanide  
 390 when given 30 min prior to CCI injury ( $p = 0.03$ , Kruskal-Wallis test with Dunn's multiple  
 391 comparisons; CCI-bumetanide vs vehicle:  $p > 0.05$ , CCI-vehicle vs sham-vehicle:  $*p < 0.05$ ;  $n =$   
 392 5-7 mice per group).

393

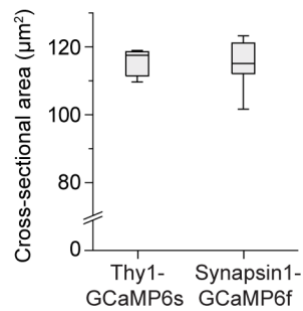

394

395 **Supplemental Figure 8.** *Cell size measurements of layer 2/3 sensory cortical neurons in Thy1-*  
396 *GCaMP6s mice and Synapsin1-driven-GCaMP6f-injected mice.* Somatic area was comparable  
397 between two groups ( $p > 0.05$ , two-sided unpaired t-test;  $n = 9-12$  mice per group). Due to no  
398 differences in cell size based on the two methods, we combined these data into one experimental  
399 group (i.e., ‘*bumetanide administered immediately post-CCI*').

400

401

402

403

404

405

406 **Availability of Data:**

407 All raw data generated in this study, including electrophysiology, two photon imaging, histology,  
408 and Western blot, as well as all analysis and statistical data, are available upon request from the  
409 corresponding authors: Punam A. Sawant-Pokam and K.C. Brennan, 383 Colorow Drive Room  
410 280A, Department of Neurology, Salt Lake City, Utah 84108, USA. Phone: 801.512.4282 (PASP),  
411 801.581.8129 (KCB); Email: punam.pokam@utah.edu, k.c.brennan@hsc.utah.edu.

412 **References**

- 413 1. Kitamura K, Judkewitz B, Kano M, Denk W, Häusser M. Targeted patch-clamp recordings  
414 and single-cell electroporation of unlabeled neurons in vivo. *Nature Methods*. 2007;5:61.
- 415 2. Brennan KC, Romero-Reyes M, López Valdés HE, Arnold AP, Charles AC. Reduced  
416 threshold for cortical spreading depression in female mice. *Annals of Neurology*.  
417 2007;61(6):603–606.
- 418 3. Bogdanov VB et al. Susceptibility of Primary Sensory Cortex to Spreading Depolarizations. *J.*  
419 *Neurosci*. 2016;36(17):4733.
- 420 4. Schneider CA, Rasband WS, Eliceiri KW. NIH Image to ImageJ: 25 years of image analysis.  
421 *Nature methods*. 2012;9(7):671–675.
- 422 5. Scholl EA, Dudek FE, Ekstrand JJ. Neuronal degeneration is observed in multiple regions  
423 outside the hippocampus after lithium pilocarpine-induced status epilepticus in the immature rat.  
424 *Neuroscience*. 2013;252:45–59.
- 425 6. Sivakumaran S, Maguire J. Bumetanide reduces seizure progression and the development of  
426 pharmacoresistant status epilepticus. *Epilepsia*. 2016;57(2):222–232.
- 427 7. Sawant-Pokam P, Suryavanshi P, Dudek F, Brennan K. Mechanisms of Neuronal Silencing  
428 After Cortical Spreading Depression. *Cerebral Cortex*. 2017;27:1311–1325.
- 429 8. Dana H et al. Thy1-GCaMP6 transgenic mice for neuronal population imaging in vivo. *PLoS*  
430 *one*. 2014;9(9):e108697–e108697.

- 431 9. Han EB, Stevens CF. Development regulates a switch between post- and presynaptic  
432 strengthening in response to activity deprivation. *Proceedings of the National Academy of*  
433 *Sciences of the United States of America*. 2009;106(26):10817–10822.
- 434 10. Fatt P, Katz B. Spontaneous subthreshold activity at motor nerve endings. *The Journal of*  
435 *physiology*. 1952;117(1):109–128.
- 436 11. Carron SF, Alwis DS, Rajan R. Traumatic Brain Injury and Neuronal Functionality Changes  
437 in Sensory Cortex. *Front Syst Neurosci*. 2016;10:47.
- 438 12. Sanchez-Vives MV et al. Inhibitory Modulation of Cortical Up States. *Journal of*  
439 *Neurophysiology*. 2010;104(3):1314–1324.
- 440 13. Wang M, Ramos B, McCormick D.  $\alpha$ 2A-Adrenoceptors Strengthen Working Memory  
441 Networks by Inhibiting cAMP-HCN Channel Signaling in Prefrontal Cortex. *Cell*.  
442 2007;129(2):397–410.
- 443 14. Magee J, Hoffman D, Colbert C, Johnston D. Electrical and calcium signaling in dendrites of  
444 hippocampal pyramidal neurons. *Annu. Rev. Physiol*. 1998;60(1):327–346.
- 445 15. Poolos NP, Migliore M, Johnston D. Pharmacological upregulation of h-channels reduces the  
446 excitability of pyramidal neuron dendrites. *Nature Neuroscience*. 2002;5:767.
- 447 16. Deng P, Xu ZC. Contribution of  $I_h$  to Neuronal Damage in the Hippocampus after Traumatic  
448 Brain Injury in Rats. *Journal of Neurotrauma*. 2011;28(7):1173–1183.
- 449 17. Larkum ME, Waters J, Sakmann B, Helmchen F. Dendritic Spikes in Apical Dendrites of  
450 Neocortical Layer 2/3 Pyramidal Neurons. *J. Neurosci*. 2007;27(34):8999.

- 451 18. Sheets PL et al. Corticospinal-specific HCN expression in mouse motor cortex: I(h)-  
452 dependent synaptic integration as a candidate microcircuit mechanism involved in motor control.  
453 *Journal of Neurophysiology*. 2011;106(5):2216–2231.
- 454 19. Thuault SJ et al. Prefrontal Cortex HCN1 Channels Enable Intrinsic Persistent Neural Firing  
455 and Executive Memory Function. *J. Neurosci*. 2013;33(34):13583.
- 456 20. von Baumgarten L, Trabold R, Thal S, Back T, Plesnila N. Role of Cortical Spreading  
457 Depressions for Secondary Brain Damage after Traumatic Brain Injury in Mice. *J Cereb Blood*  
458 *Flow Metab*. 2008;28(7):1353–1360.
- 459 21. Rogatsky GG, Sonn J, Kamenir Y, Zarchin N, Mayevsky A. Relationship between  
460 Intracranial Pressure and Cortical Spreading Depression following Fluid Percussion Brain Injury  
461 in Rats. *Journal of Neurotrauma*. 2003;20(12):1315–1325.
- 462 22. Zhou, Gordon, Feighan, MacVicar. Transient swelling, acidification, and mitochondrial  
463 depolarization occurs in neurons but not astrocytes during spreading depression. *Cerebral*  
464 *Cortex*. 2010;20(11):2614–2624.
- 465 23. Takano, Tian, Peng, Lou, Nedergaard. Cortical spreading depression causes and coincides  
466 with tissue hypoxia. *Nature neuroscience*. 2007;10:754–762.
- 467 24. Mestre H et al. Cerebrospinal fluid influx drives acute ischemic tissue swelling. *Science*.  
468 2020;367(6483):eaax7171.
- 469 25. Pacheco JM et al. Spreading Depolarizations Occur in Mild Traumatic Brain Injuries and Are  
470 Associated with Postinjury Behavior. *eNeuro*. 2019;6(6):ENEURO.0070-19.2019

- 471 26. Tang YT et al. Minimum conditions for the induction of cortical spreading depression in  
472 brain slices. *J Neurophysiol.* 2014;112(10):2572–2579.
- 473 27. Liu H-T, Tashmukhamedov BA, Inoue H, Okada Y, Sabirov RZ. Roles of two types of anion  
474 channels in glutamate release from mouse astrocytes under ischemic or osmotic stress. *Glia.*  
475 2006;54(5):343–357.
- 476 28. Kimelberg HK, Rutledge E, Goderie S, Charniga C. Astrocytic Swelling Due to Hypotonic  
477 or High K<sup>+</sup> Medium Causes Inhibition of Glutamate and Aspartate Uptake and Increases Their  
478 Release. *J Cereb Blood Flow Metab.* 1995;15(3):409–416.
- 479 29. Abdullaev IF, Rudkouskaya A, Schools GP, Kimelberg HK, Mongin AA. Pharmacological  
480 comparison of swelling-activated excitatory amino acid release and Cl<sup>-</sup> currents in cultured rat  
481 astrocytes. *The Journal of physiology.* 2006;572(Pt 3):677–689.
- 482 30. Lauderdale K et al. Osmotic Edema Rapidly Increases Neuronal Excitability Through  
483 Activation of NMDA Receptor-Dependent Slow Inward Currents in Juvenile and Adult  
484 Hippocampus. *ASN neuro.* 2015;7(5):1759091415605115.
- 485 31. Jayakumar AR et al. Na-K-Cl Cotransporter-1 in the mechanism of ammonia-induced  
486 astrocyte swelling. *The Journal of biological chemistry.* 2008;283(49):33874–33882.
- 487 32. Töpfer M et al. Consequences of inhibition of bumetanide metabolism in rodents on brain  
488 penetration and effects of bumetanide in chronic models of epilepsy. *European Journal of*  
489 *Neuroscience.* 2014;39(4):673–687.

- 490 33. Ullah G, Wei Y, Dahlem MA, Wechselberger M, Schiff SJ. The Role of Cell Volume in the  
491 Dynamics of Seizure, Spreading Depression, and Anoxic Depolarization. *PLoS computational*  
492 *biology*. 2015;11(8):e1004414.
- 493 34. Spong KE, Chin B, Witiuk KLM, Robertson RM. Cell swelling increases the severity of  
494 spreading depression in *Locusta migratoria*. *Journal of Neurophysiology*. 2015;114(6):3111–  
495 3120.
- 496 35. Dudek FE, Obenaus A, Tasker JG. Osmolality-induced changes in extracellular volume alter  
497 epileptiform bursts independent of chemical synapses in the rat: Importance of non-synaptic  
498 mechanisms in hippocampal epileptogenesis. *Neuroscience Letters*. 1990;120(2):267–270.
- 499 36. Haglund MM, Hochman DW. Furosemide and Mannitol Suppression of Epileptic Activity in  
500 the Human Brain. *Journal of Neurophysiology*. 2005;94(2):907–918.
- 501 37. Jefferys JG. Nonsynaptic modulation of neuronal activity in the brain: electric currents and  
502 extracellular ions. *Physiological Reviews*. 1995;75(4):689–723.
- 503 38. Rosen AS, Andrew RD. Osmotic effects upon excitability in rat neocortical slices.  
504 *Neuroscience*. 1990;38(3):579–590.
- 505 39. Andrew RD, Fagan M, Ballyk BA, Rosen AS. Seizure susceptibility and the osmotic state.  
506 *Brain Research*. 1989;498(1):175–180.
- 507 40. Dudek FE, Yasumura T, Rash JE. Non-Synaptic mechanisms in seizures and epileptogenesis.  
508 *Cell Biology International*. 1998;22(11-12):793–805.

- 509 41. Andrew RD, Labron MW, Boehnke SE, Carnduff L, Kirov SA. Physiological Evidence That  
510 Pyramidal Neurons Lack Functional Water Channels. *Cerebral Cortex*. 2006;17(4):787–802.
- 511 42. Glykys et al. Chloride Dysregulation, Seizures, and Cerebral Edema: A Relationship with  
512 Therapeutic Potential. *Trends in Neurosciences*. 2017;40:276–294.
- 513 43. Caspi A, Benninger F, Yaari Y. KV7/M Channels Mediate Osmotic Modulation of Intrinsic  
514 Neuronal Excitability. *J. Neurosci*. 2009;29(36):11098.
- 515 44. Murphy TR et al. Hippocampal and Cortical Pyramidal Neurons Swell in Parallel with  
516 Astrocytes during Acute Hypoosmolar Stress. *Frontiers in Cellular Neuroscience*. 2017;11:275.
- 517 45. Azouz R, Alroy G, Yaari Y. Modulation of endogenous firing patterns by osmolarity in rat  
518 hippocampal neurones. *J Physiol*. 1997;502:175–187.
- 519 46. Rosen AS, David Andrew R. Glucose concentration inversely alters neocortical slice  
520 excitability through an osmotic effect. *Brain Research*. 1991;555(1):58–64.
- 521 47. Johnstone VPA, Shultz SR, Yan EB, O’Brien TJ, Rajan R. The Acute Phase of Mild  
522 Traumatic Brain Injury Is Characterized by a Distance-Dependent Neuronal Hypoactivity.  
523 *Journal of Neurotrauma*. 2014;31(22):1881–1895.
- 524 48. Johnstone VPA, Yan EB, Alwis DS, Rajan R. Cortical Hypoexcitation Defines Neuronal  
525 Responses in the Immediate Aftermath of Traumatic Brain Injury. *PLOS ONE*.  
526 2013;8(5):e63454.
- 527 49. Fabricius M et al. Cortical spreading depression and peri-infarct depolarization in acutely  
528 injured human cerebral cortex. *Brain*. 2006;129(3):778–790.

- 529 50. Hartings JA et al. Spreading depolarizations have prolonged direct current shifts and are  
530 associated with poor outcome in brain trauma. *Brain*. 2011;134(5):1529–1540.
- 531 51. Otto JF et al. Electroconvulsive seizure thresholds and kindling acquisition rates are altered  
532 in mouse models of human KCNQ2 and KCNQ3 mutations for benign familial neonatal  
533 convulsions. *Epilepsia*. 2009;50(7):1752–1759.
- 534 52. Browning RA, Nelson DK. Modification of electroshock and pentylenetetrazol seizure  
535 patterns in rats after precollicular transections. *Experimental Neurology*. 1986;93(3):546–556.
- 536 53. Eells JB, Clough RW, Browning RA, Jobe PC. Comparative fos immunoreactivity in the  
537 brain after forebrain, brainstem, or combined seizures induced by electroshock,  
538 pentylenetetrazol, focally induced and audiogenic seizures in rats. *Neuroscience*.  
539 2004;123(1):279–292.
- 540 54. Goubert E et al. Bumetanide Prevents Brain Trauma-Induced Depressive-Like Behavior.  
541 *Frontiers in Molecular Neuroscience*. 2019;12:12.
